# Supplementary material for: Capsular glycan recognition provides antibody-mediated immunity against tuberculosis
Source: JCI journal article supplement (doi:10.1172/jci128459), 2020-01-14
Supplement: sd1 [file 1]

**Supplemental Table 1. AM oligosaccharide structures and correlations between serum IgG reactivity to each AM OS and Mtb macrophage phagocytosis in TST+/IGRA+ and TB subject groups**

|             |                                                                                     | TST+/IGRA+  |             | TB    |      |             |                                                                                     | TST+/IGRA+ |      | TB    |      |             |                                                                                       | TST+/IGRA+  |             | TB    |      |
|-------------|-------------------------------------------------------------------------------------|-------------|-------------|-------|------|-------------|-------------------------------------------------------------------------------------|------------|------|-------|------|-------------|---------------------------------------------------------------------------------------|-------------|-------------|-------|------|
|             |                                                                                     | r           | p           | r     | p    |             |                                                                                     | r          | p    | r     | p    |             |                                                                                       | r           | p           |       |      |
| <b>S#1</b>  |    | 0.39        | 0.26        | 0.40  | 0.18 | <b>S#11</b> |    | 0.18       | 0.63 | 0.26  | 0.39 | <b>S#23</b> |    | 0.21        | 0.56        | 0.22  | 0.47 |
| <b>S#2</b>  |    | 0.61        | 0.07        | 0.35  | 0.24 | <b>S#12</b> |    | 0.20       | 0.58 | -0.27 | 0.37 | <b>S#25</b> |    | 0.28        | 0.43        | -0.25 | 0.40 |
| <b>S#3</b>  |    | <b>0.70</b> | <b>0.03</b> | 0.38  | 0.20 | <b>S#15</b> |    | 0.38       | 0.28 | 0.24  | 0.42 | <b>S#44</b> |    | 0.13        | 0.73        | -0.09 | 0.77 |
| <b>S#4</b>  |    | 0.36        | 0.31        | -0.22 | 0.46 | <b>S#16</b> |    | 0.33       | 0.35 | 0.43  | 0.14 | <b>S#46</b> |    | -0.18       | 0.63        | 0.11  | 0.71 |
| <b>S#5</b>  |    | 0.05        | 0.89        | -0.02 | 0.95 | <b>S#17</b> |    | 0.16       | 0.66 | -0.69 | 0.01 | <b>S#49</b> |    | <b>0.68</b> | <b>0.03</b> | 0.29  | 0.33 |
| <b>S#6</b>  |    | 0.14        | 0.70        | 0.04  | 0.91 | <b>S#18</b> |    | 0.45       | 0.19 | 0.21  | 0.48 | <b>S#50</b> |    | -0.17       | 0.64        | -0.34 | 0.26 |
| <b>S#7</b>  |   | <b>0.68</b> | <b>0.03</b> | 0.27  | 0.38 | <b>S#19</b> |   | 0.56       | 0.10 | 0.03  | 0.92 | <b>S#56</b> |   | 0.58        | 0.09        | 0.26  | 0.40 |
| <b>S#8</b>  |  | <b>0.77</b> | <b>0.01</b> | 0.47  | 0.10 | <b>S#20</b> |  | 0.43       | 0.22 | 0.43  | 0.14 | <b>S#57</b> |  | 0.55        | 0.10        | 0.16  | 0.61 |
| <b>S#9</b>  |  | <b>0.76</b> | <b>0.01</b> | 0.03  | 0.92 | <b>S#21</b> |  | 0.55       | 0.10 | 0.14  | 0.64 | <b>S#58</b> |  | -0.43       | 0.21        | -0.46 | 0.11 |
| <b>S#10</b> |  | -0.02       | 0.97        | -0.02 | 0.96 | <b>S#22</b> |  | 0.47       | 0.18 | 0.24  | 0.43 | <b>S#59</b> |  | 0.01        | > 0.99      | -0.04 | 0.90 |

Green star: Araf residue; green circle: mannose; orange star: xylose residue. Spearman rank correlation. Compound S#46 is an OS motif of the mycobacterial capsular PS alpha-glucan, which served as a control. TST+/IGRA+: Tuberculin skin-test positive, interferon-gamma release assay positive asymptomatic subjects; TB: subjects with active tuberculosis.

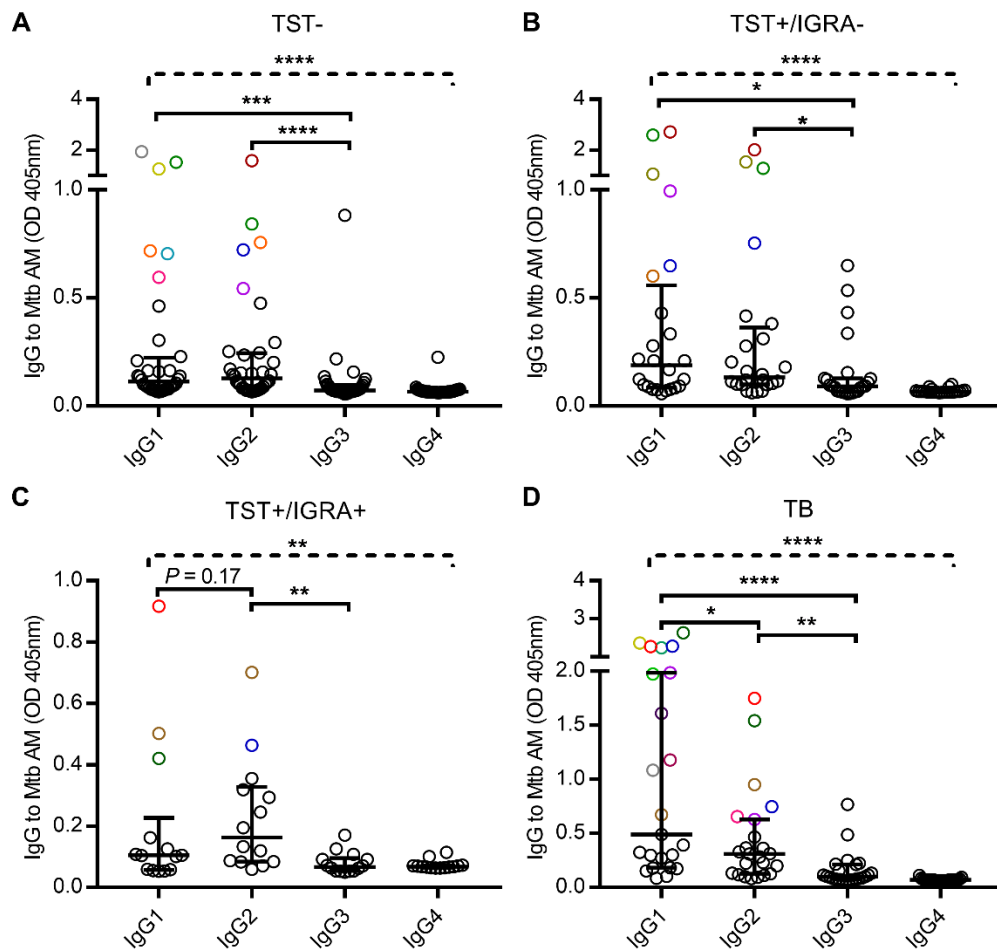

**Supplemental Figure 1. Comparison of IgG1-4 subclass responses to Mtb (H37Rv) capsular AM among subjects at various Mtb infection states. (A–D)** Sera (1:50) from (A) asymptomatic TST- subjects,  $n = 36$ ; (B) Asymptomatic TST+/IGRA- subjects,  $n = 24$ ; (C) Asymptomatic TST+/IGRA+ subjects,  $n = 14$ ; and (D) TB patients,  $n = 23$ . Subjects with an anti-IgG subclass titer  $> 0.4$  in TST+/IGRA+ group, and  $> 0.5$  in other groups have been assigned individual different colors. TST: Tuberculin skin-test; IGRA: Interferon-gamma release assay; TB: active tuberculosis. Dashed lines represent Friedman test for comparison of paired values of multiple groups. Solid lines represent Wilcoxon matched-pairs signed rank test. Lines and error bars represent medians with interquartile ranges. \*:  $P < 0.05$ , \*\*:  $P < 0.01$ , \*\*\*:  $P < 0.001$ , and \*\*\*\*:  $P < 0.0001$ .

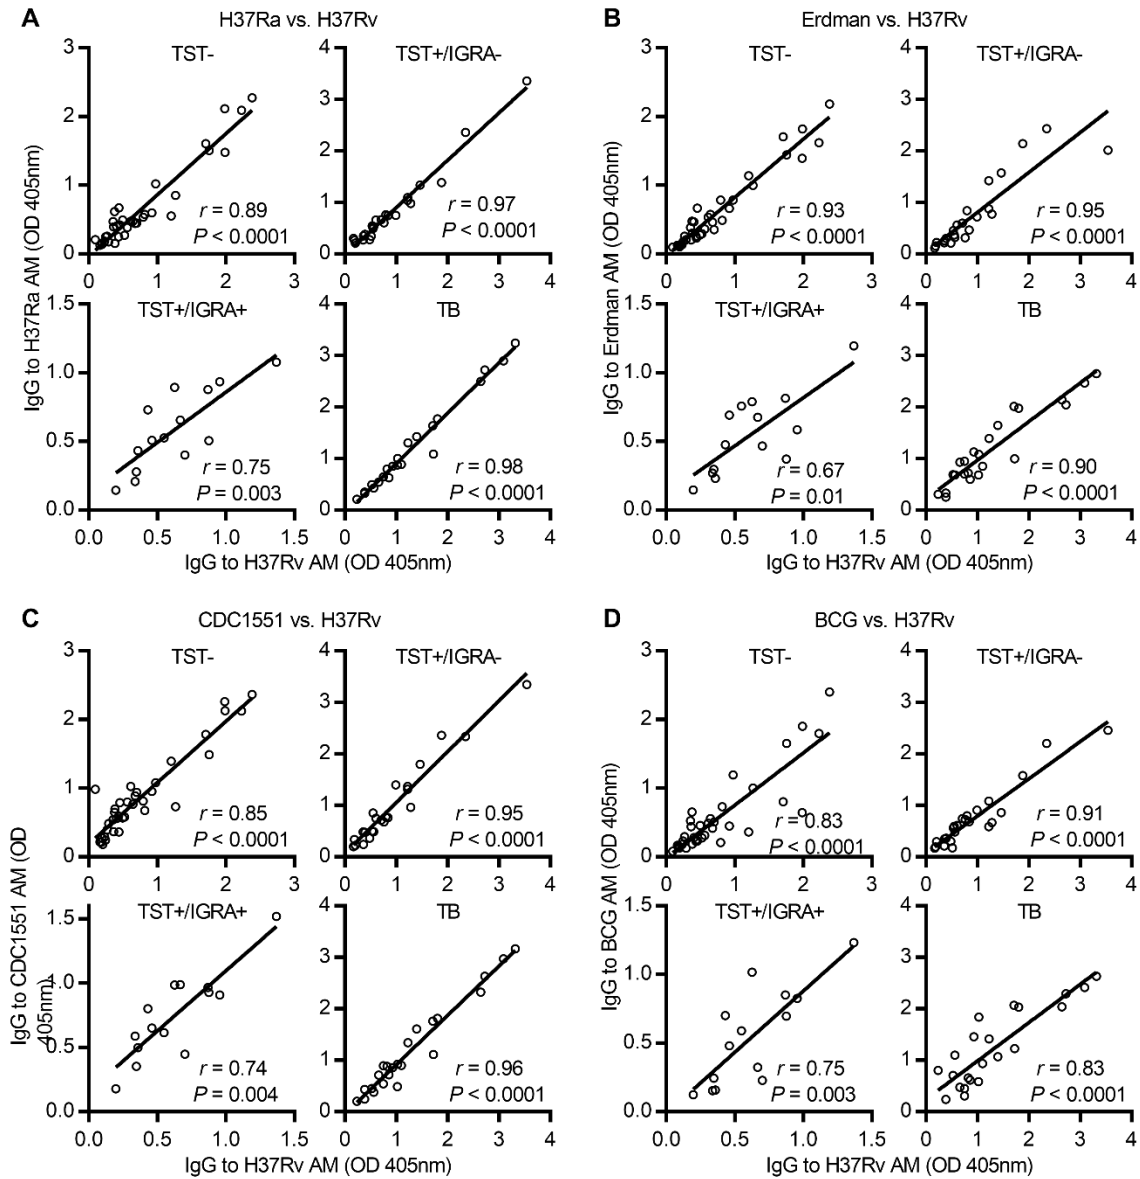

**Supplemental Figure 2. Cross-reactivity of IgG to capsular AM isolated from different strains of the Mtb complex group irrespective of Mtb infection state.** (A–D) Scatter plots show correlations between serum (1:50) IgG responses to AM isolated from Mtb H37Rv versus (A) the avirulent Mtb strain H37Ra; (B) the lab Mtb strain Erdman; (C) the clinical Mtb strain CDC1551; and (D) the *M. bovis* BCG vaccine strain (Pasteur) for each subject group. TST-: Asymptomatic TST negative subjects,  $n = 36$ ; TST+/IGRA-: Asymptomatic TST positive IGRA negative subjects,  $n = 24$ ; TST+/IGRA+: Asymptomatic TST positive IGRA positive subjects,  $n = 14$ ; and TB: patients with active tuberculosis,  $n = 23$ . TST: Tuberculin skin-test; and IGRA: Interferon-gamma release assay. Spearman rank.

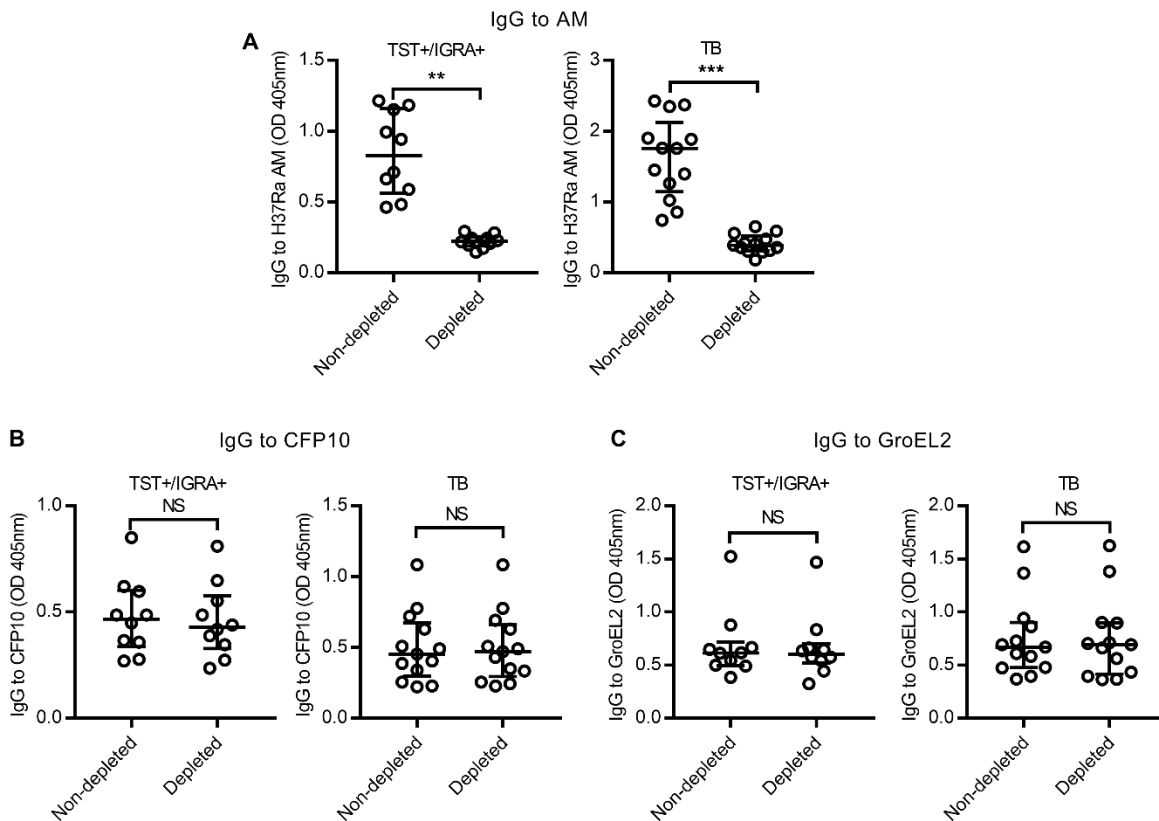

**Supplemental Figure 3. Significant reduction of IgG reactivity to AM but not to other *Mtb* antigens in heat-inactivated sera depleted of anti-AM antibodies. (A)** IgG responses to capsular AM isolated from *Mtb* H37Ra in non-depleted compared to anti-AM Ab depleted sera (1:100) by AM-coupled beads. **(B–C)** IgG responses in non-depleted compared to anti-AM Ab depleted sera to **(B)** the secreted *Mtb* protein CFP10, and **(C)** the surface protein GroEL2. Lines and error bars represent medians with interquartile ranges. TST+/IGRA+: Tuberculin skin-test positive, interferon-gamma release assay positive asymptomatic subjects,  $n = 10$ ; and TB: subjects with active tuberculosis,  $n = 13$ . Wilcoxon matched-pairs signed rank test. \*\*:  $P < 0.01$ , \*\*\*:  $P < 0.001$ , and NS: not significant ( $P \geq 0.05$ ).

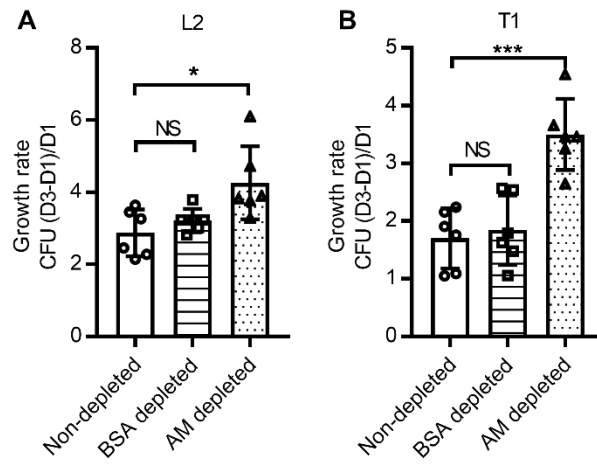

**Supplemental Figure 4.** Depletion of sera with AM-coupled beads enhanced Mtb intracellular growth compared to non-depleted sera or sera depleted with BSA-coupled beads. Columns and error bars represent mean and SD. Unpaired t test. \*:  $P < 0.05$ , \*\*\*:  $P < 0.001$ , and NS: not significant ( $P \geq 0.05$ ).

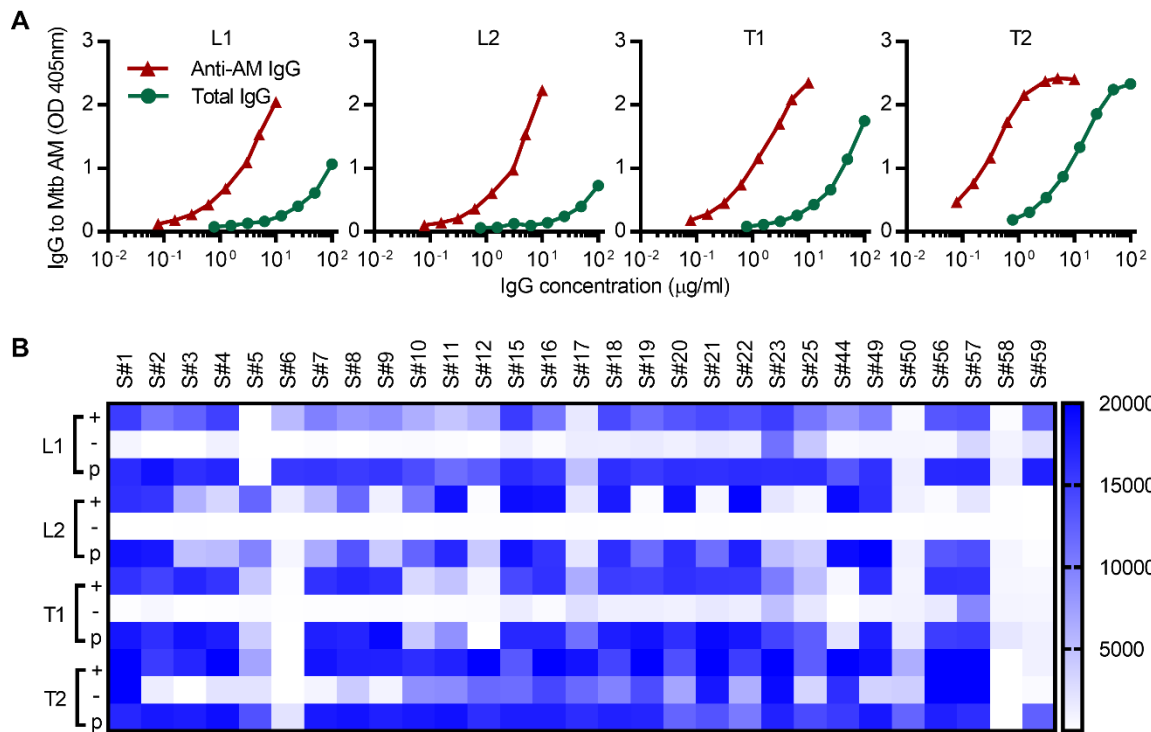

**Supplemental Figure 5. Purification of anti-AM polyclonal IgG from human sera. (A)** Anti-AM polyclonal IgG purified from two TST+/IGRA+ (L1 & L2) and two TST+/IGRA- sera (T1 & T2) showed higher binding capacity to capsular AM than the corresponding total IgG used at the same concentrations. **(B)** Reactivity of serum IgG to AM OS motifs before (+) and after AM-specific Ab depletion (-), and for purified AM-specific IgG (p). Color features represent the median fluorescent reactivity (MFI) to each of the OS motifs.

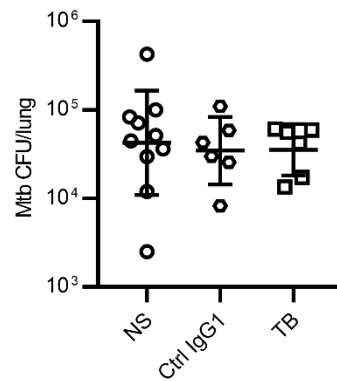

**Supplemental Figure 6. Passive transfer of purified human anti-AM polyclonal IgG from a TB patient showed no effect on mycobacterial burden in Mtb-infected mice.** Lung CFU (mean and SD) 2 weeks after low-dose infection (Erdman; mean lung CFU 35±3 one day post infection) in mice receiving i.p. normal saline (NS;  $n = 10$ ), irrelevant IgG1 control mAb (Ctrl IgG1;  $n = 6$ ) or anti-AM IgG (8  $\mu\text{g}$  i.p. one day pre-infection, 4  $\mu\text{g}$  at one day and 4  $\mu\text{g}$  at one week post-infection) from one high-titer pulmonary TB patient ( $n = 6$ ). One-way ANOVA  $P = 0.9$ .
